# Supplementary material for: Historical Epidemics Cartography Generated by Spatial Analysis: Mapping the Heterogeneity of Three Medieval "Plagues" in Dijon
Source: PubMed Central journal article supplement (PMC4666600; doi:10.1371/journal.pone.0143866), 2015-12-01
Supplement: pone.0143866.s002.pdf [file pone.0143866.s002.pdf]

## Deaths of 1400 in the *marcs* tax register [ADCO, B11490, 1401, folio 2v]

Additional indication:  
death, absence,  
reason for tax  
exemption...  
No indication:  
present and taxed

|           | names of heads of households                                 | amount of tax                        |
|-----------|--------------------------------------------------------------|--------------------------------------|
|           | Geuffroy & Guiffon pour lui pour fu<br>mille & fime deobiane | 6/                                   |
| mort-     | Estienne & maçon                                             | 12 deniers<br>(1 sol)                |
|           | Jehanette & fice repie                                       | 12 deniers                           |
|           | Jehan fils au chappelle                                      | 5 sols                               |
|           | Jehan fils d'uz le beaulin                                   | 6/                                   |
| mort-     | Edm d'aulene                                                 | no tax<br>(exempted<br>and dead)     |
|           | Emonne & Perous                                              | no tax<br>(exempted<br>and dead)     |
| port mort | portier mort<br>("dead<br>gatekeeper")                       |                                      |
|           | Jehan d'aulene                                               |                                      |
|           | Jehan fils Jehan prou                                        |                                      |
|           | Guille d'aulene d'uz le beaulin le maçon                     |                                      |
| mort-     | Dommanet le puffer & chaman                                  |                                      |
|           | Jehan & choye mormore                                        |                                      |
| mort-     | Guichin & Gilles foyent                                      | amount of tax<br>crossed<br>(dead)   |
| mort-     | Guot d'ampre                                                 | amount of tax<br>crossed<br>(dead)   |
| ale       | Jehan d'ureau                                                | amount of tax<br>crossed<br>(absent) |

Red circles: concerns dead heads of households  
Blue circles: concerns absent heads of households  
Green circles: concerns present heads of households
